# Supplementary material for: Orlistat‐Induced Gut Microbiota Modification in Obese Mice
Source: Hindawi journal article supplement (doi:10.1155/2020/9818349), 2020-01-01
Supplement: f1 [file 9818349.f1.pdf]

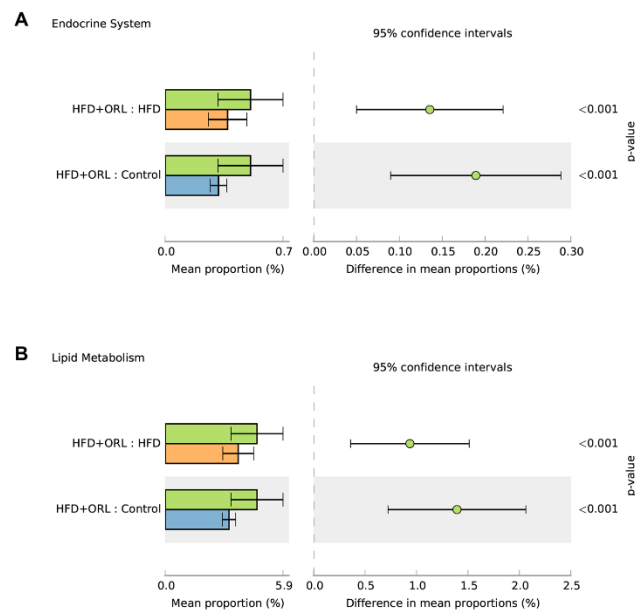

**Suppl. Fig. 1. Predicted metagenomic function related to secondary KEGG pathways.**

Enriched KEGG pathways, (A) “Endocrine system” and (B) “Lipid metabolism” were detected by PICRUSt and STAMP. For pairwise comparison among HFD+ORL (green box), HFD (orange box) and control group (blue box), mean proportions (%) and differences in mean proportions (%) were presented at left and right, respectively. *P* values were also shown for each comparison.
